# Supplementary material for: Synthesis and characterization of Y-shaped optical nonlinear chromophores with strong acceptors
Source: Royal Society of Chemistry journal article supplement (doi:10.1039/d3nj01255g), 2023-01-01
Supplement: d3nj01255g1.pdf [file d3nj01255g1.pdf]

### Electronic supplementary information (ESI)

#### Synthesis and characterization of Y-shaped optical nonlinear chromophores with strong acceptor

Zhibei Li <sup>a</sup>, Ziyang Zeng <sup>a</sup>, Shuangke wu <sup>a</sup>, Jianhua Liu <sup>b\*</sup>, Tongyu Luo <sup>a</sup>, Juanfei Liao <sup>a</sup>, Ruoxi Yang <sup>a</sup> and Fenggang Liu <sup>a\*</sup>

<sup>a</sup>School of Chemistry and Chemical Engineering, Guangzhou University, Guangzhou 510006, P. R. China. E-mail address: liufg6@gzhu.edu.cn

<sup>b</sup>Huawei Technologies, Bantian Industrial Base, Shenzhen 518129, P. R. China. E-mail address:liujianhua.liu@huawei.com

#### 1. Optical properties

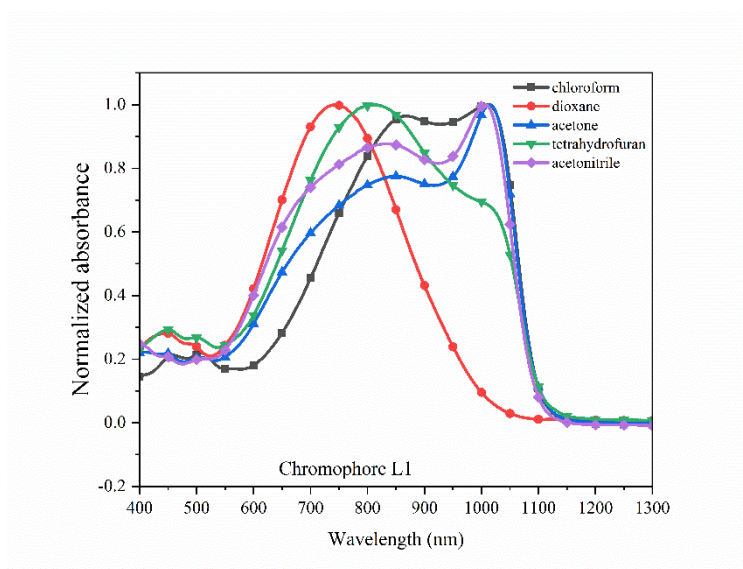

Figure S1 UV absorption spectra of chromophore L1 in solvents

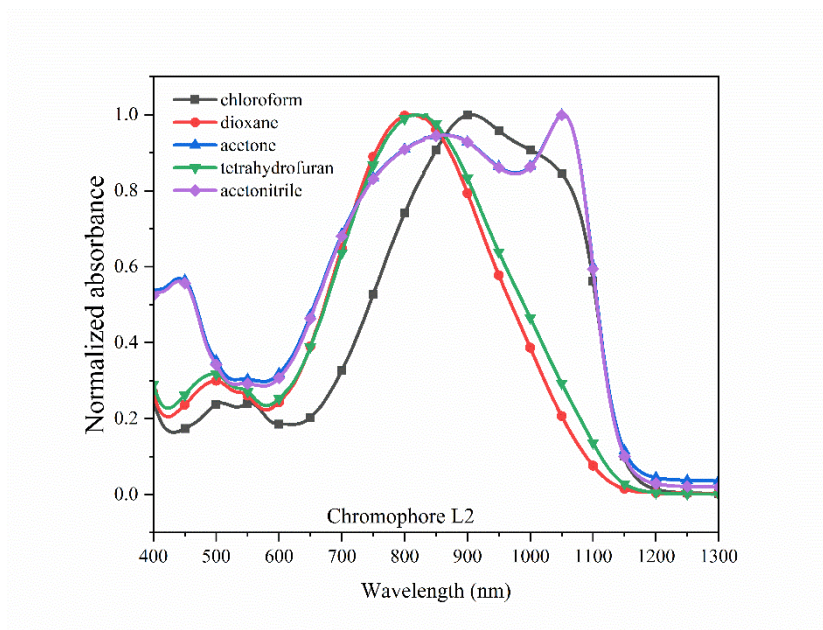

**Figure S2 UV absorption spectra of chromophore L2 in solvents**

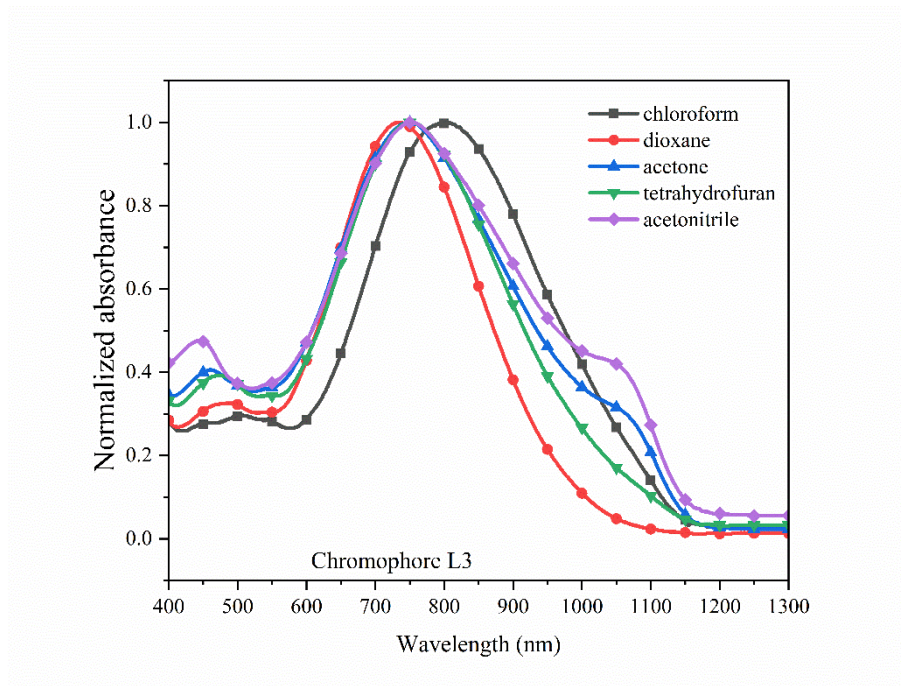

**Figure S3 UV absorption spectra of chromophore L3 in solvents**

## 2. Theoretical calculations

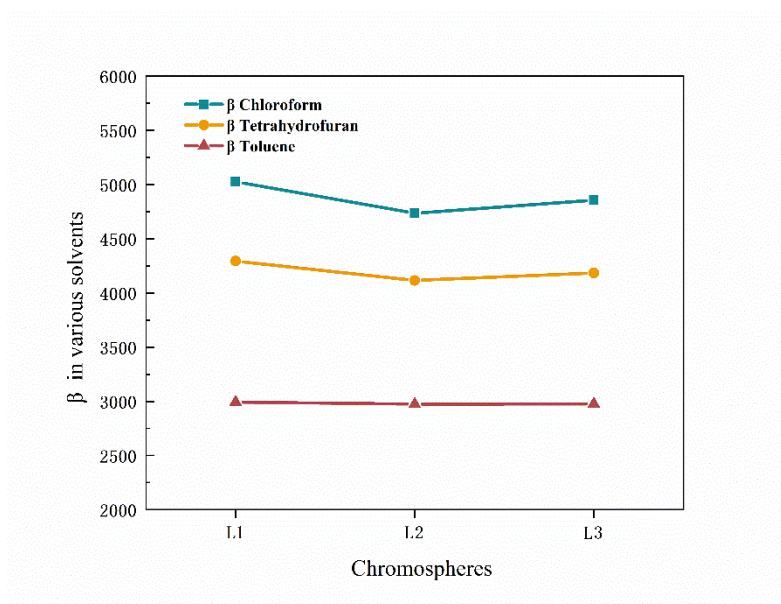

**Figure S4.** Hyperpolarizability in toluene, chloroform and tetrahydrofuran solution for chromophores L1-L3 calculated by DFT (M062X/6-31+G(d))

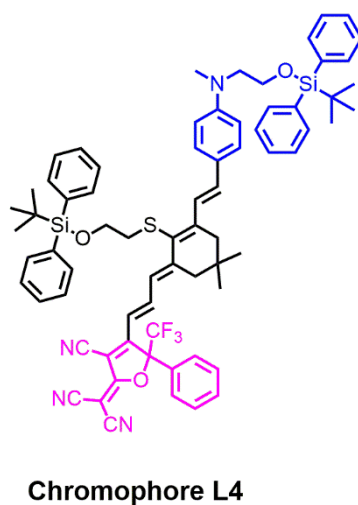

**Figure S5.** Chemical structure of monodonor chromophore L4

**Table S1** Summary of DFT and EO coefficients of chromophores

| Cmpd      | $\Delta E(\text{DFt})$<br><sup>a</sup> (eV) | $\mu^b$<br>(D) | Cam <sup>c</sup> | Chl <sup>d</sup> | Thf <sup>e</sup> | Tol <sup>f</sup> | max.r <sub>33</sub><br>(pm/V) |
|-----------|---------------------------------------------|----------------|------------------|------------------|------------------|------------------|-------------------------------|
| <b>L4</b> | 3.77                                        | 21.15          | 987              | 3077             | 2661             | 1911             | 173                           |

<sup>a</sup> calculated from DFT calculations. <sup>b</sup> the total dipole moment. <sup>cdef</sup> First order hyperpolarizability calculated in vacuum, Chloroform, Tetrahydrofuran and Toluene, respectively.

### 3. $^1\text{H}$ and $^{13}\text{C}$ NMR spectra

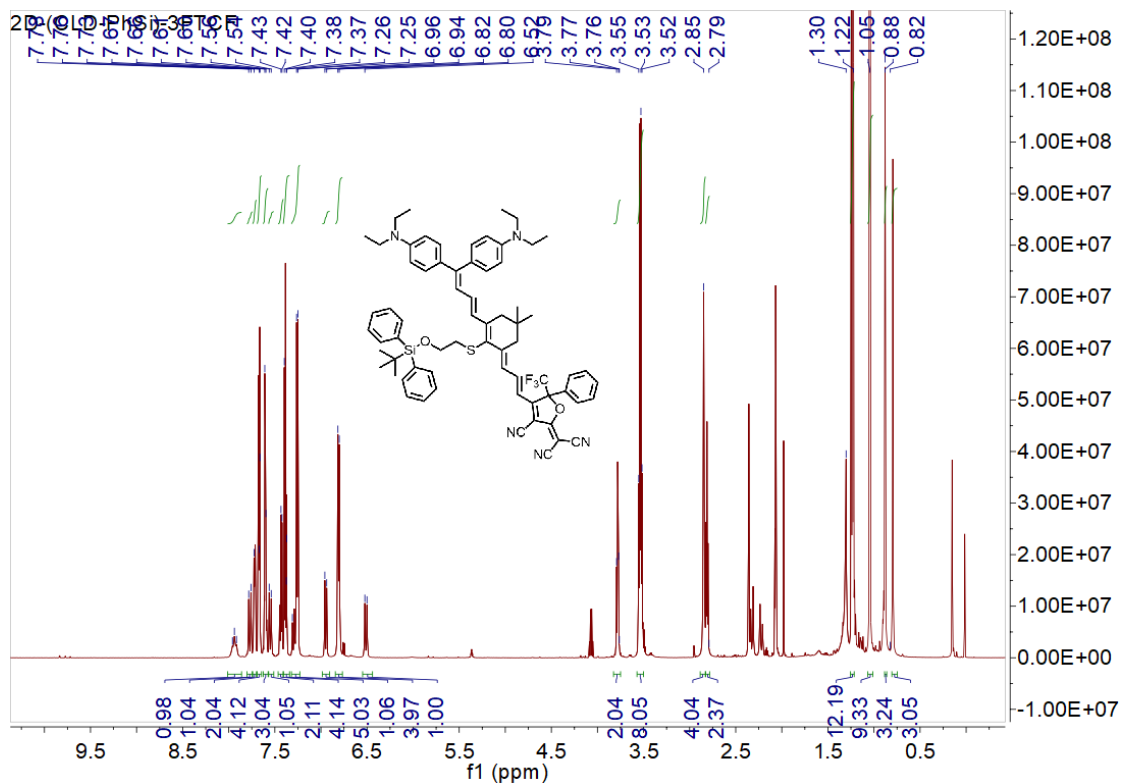

Figure S6.  $^1\text{H}$  NMR spectra of chromophore L1

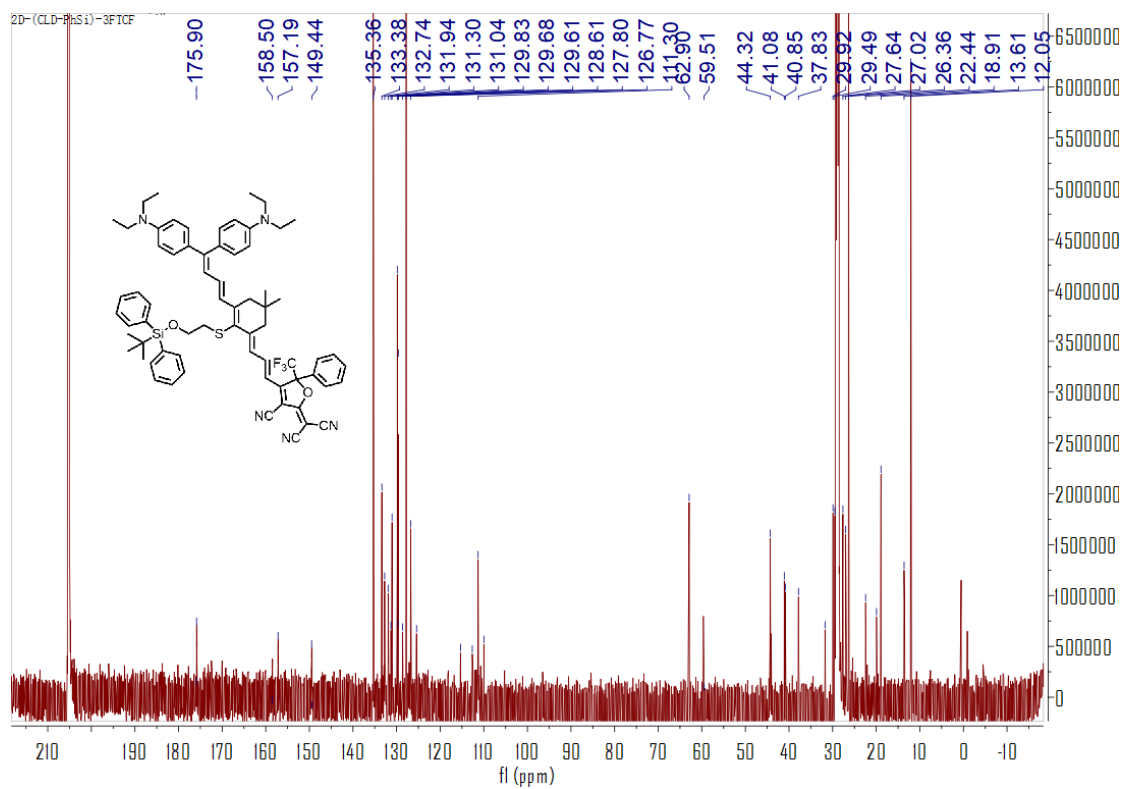

Figure S7.  $^{13}\text{C}$  NMR spectra of chromophore L1

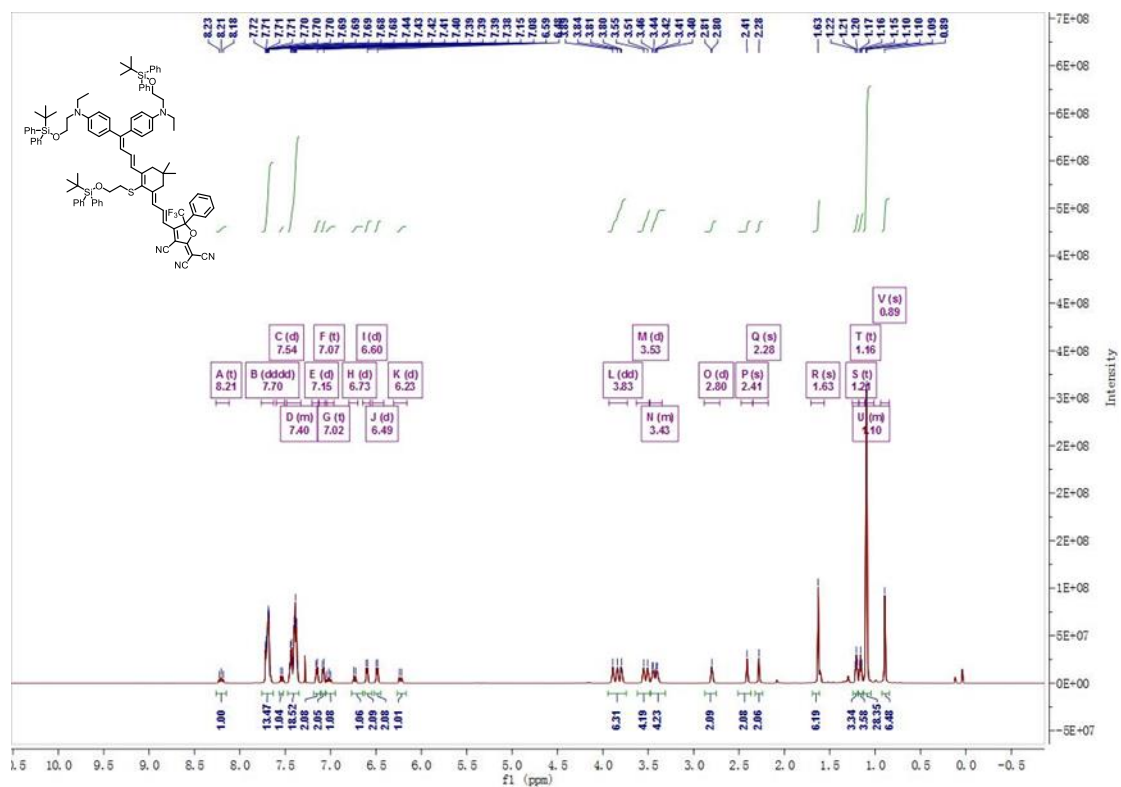

Figure S8. <sup>1</sup>H NMR spectra of chromophore L2

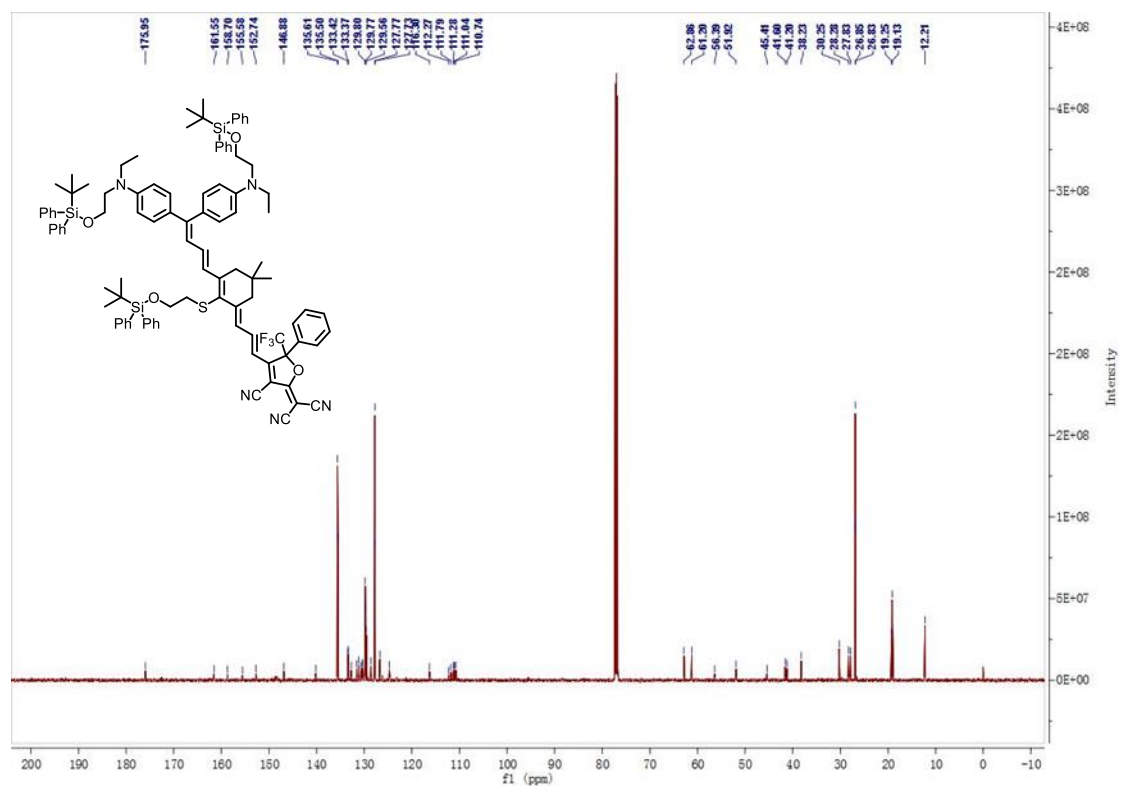

Figure S9. <sup>13</sup>C NMR spectra of chromophore L2

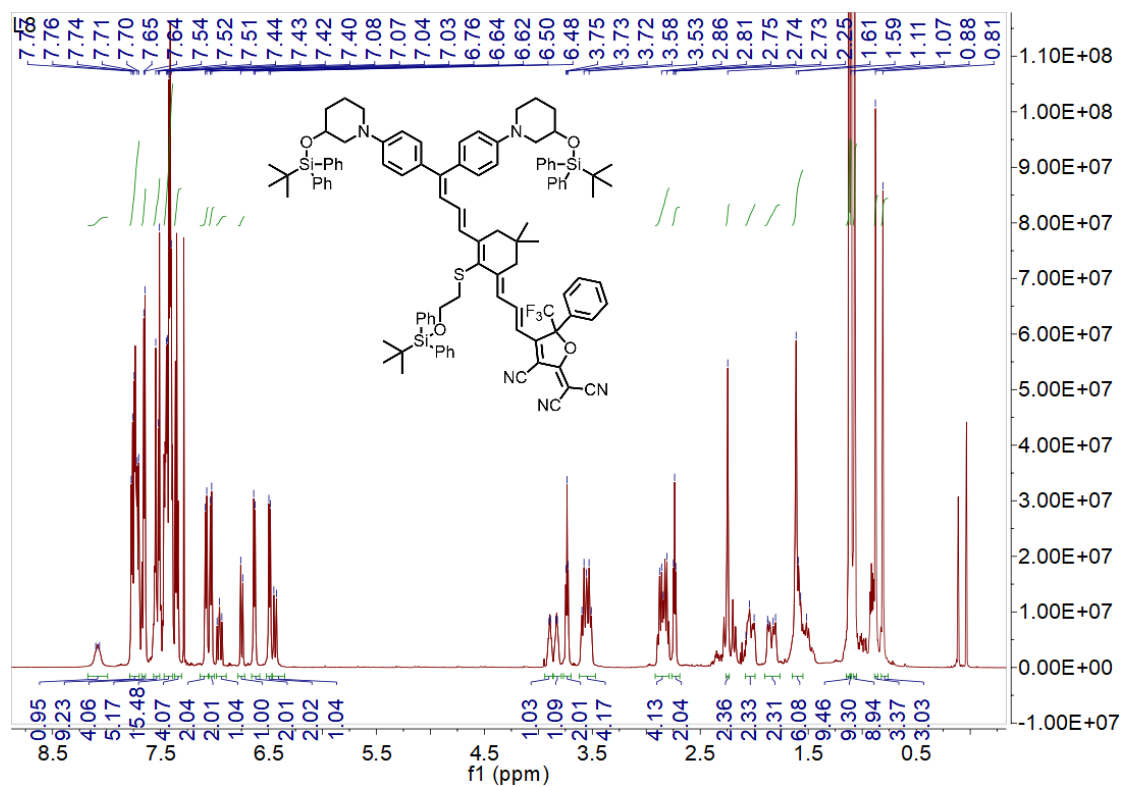

Figure S10.  $^1\text{H}$  NMR spectra of chromophore L3

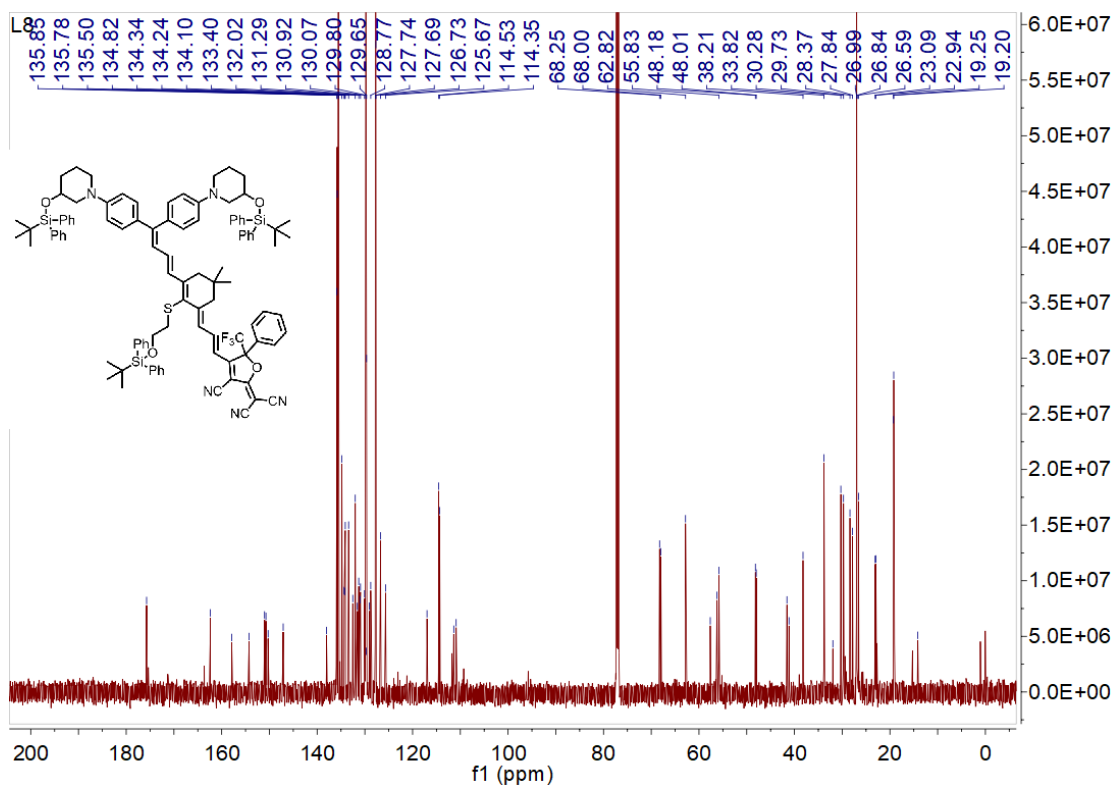

Figure S11.  $^{13}\text{C}$  NMR spectra of chromophore L3

#### 4. Poling and electro-optical coefficient parameters of chromophores

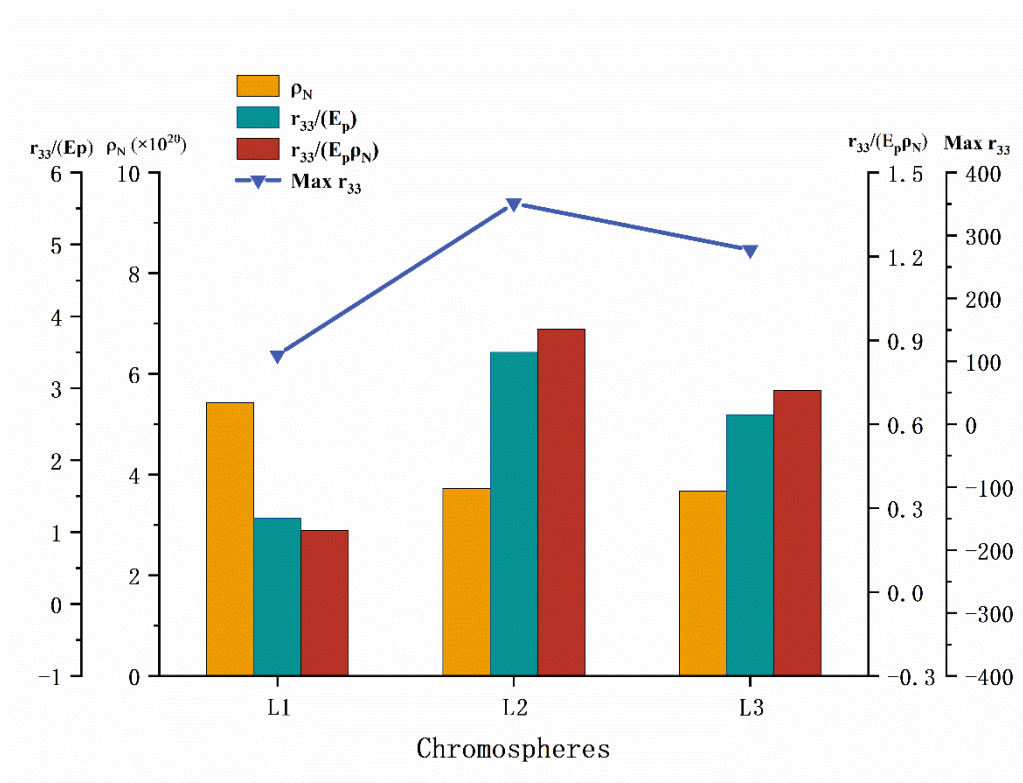

**Figure S12.** The Number density, Poling efficiency and Maximum electro-optic coefficient of chromophores L1-L3.
